# Supplementary material for: Epidemiological and Clinical Characteristics of Confirmed Cases of Severe Fever With Thrombocytopenia Syndrome in Jeju Province, Korea, 2014-2018
Source: PubMed Central journal article supplement — J Prev Med Public Health. 2019 Apr 3;52(3):195–9. doi: 10.3961/jpmph.18.289 (PMC6549013; doi:10.3961/jpmph.18.289), 2019-04-03
Supplement: jpmph-52-3-195-suppl.pdf [file jpmph-52-3-195-suppl.pdf]

# Epidemiological and Clinical Characteristics of Confirmed Cases of Severe Fever With Thrombocytopenia Syndrome in Jeju Province, Korea, 2014-2018

Jinhee Kim<sup>1</sup>, Jong-Myon Bae<sup>1,2</sup>

<sup>1</sup>Jeju Center for Infectious Diseases Control and Prevention, Jeju, Korea; <sup>2</sup>Department of Preventive Medicine, Jeju National University School of Medicine, Jeju Province, Korea

## 제주도 중증열성혈소판감소증 확진자의 역학 및 임상적 특성, 2014-2018

김진희<sup>1</sup>, 배종면<sup>1,2</sup>

<sup>1</sup>제주감염병관리지원단, <sup>2</sup>제주대학교 의학전문대학원 예방의학교실

**Objectives:** Jeju Province is well known as the region showing the highest incidence of severe fever with thrombocytopenia syndrome (SFTS) in South Korea. The aim of this study was to evaluate the epidemiological and clinical characteristics of SFTS patients in Jeju Province.

**Methods:** The primary data for this study were obtained from the Integrated Diseases and Health Control System of the Korea Centers for Disease Control and Prevention (KCDCIS). The selection criteria were confirmed cases of SFTS with a residence listed in Jeju Province at the time of diagnosis, reported to the KCDCIS between July 16, 2014 and November 30, 2018.

**Results:** Of 55 confirmed cases of SFTS, the case fatality rate was 10.9% (95% confidence interval [CI], 4.1 to 22.2). The most common presenting symptoms at diagnosis of severe fever, myalgia, and diarrhea had incidences of 83.6% (95% CI, 71.2 to 92.2), 45.5% (95% CI, 32.0 to 59.5), and 40.0% (95% CI, 27.0 to 54.1), respectively.

**Conclusions:** Compared to SFTS patients nationwide in 2013-2015, the subjects of this study exhibited a lower case fatality rate and had a lower incidence of severe fever, myalgia, and confusion.

**Key words:** Tick-borne diseases, Thrombocytopenia, Diarrhea, Bunyaviridae infections

**Received:** December 13, 2018 **Accepted:** April 2, 2019

**Corresponding author:** Jong-Myon Bae, MD, PhD  
Department of Preventive Medicine, Jeju National University School of Medicine, 102 Jejudaehak-ro, Jeju 63243, Korea

**E-mail:** jmbae@jejunu.ac.kr

This is an Open Access article distributed under the terms of the Creative Commons Attribution Non-Commercial License (<http://creativecommons.org/licenses/by-nc/4.0/>) which permits unrestricted non-commercial use, distribution, and reproduction in any medium, provided the original work is properly cited.

## 서론

중증열성혈소판감소증후군(severe fever with thrombocytopenia syndrome, SFTS)은 SFTS bunyavirus (SFTSV)란 병원체가 작은소참진드기(*Haemaphysalis longicornis*)를 매개로 이루어지는 감염병이다[1]. 2009년 중국 중부 지역에서 고열 및 혈소판감소증을 주되게 보인 점에 따라 2010년 3월 이후로 SFTS란 병명이 붙었다[2].

그러나 최근 보고에 따르면[3], 중국인 환자에 비해 한국인 환자는 설사와 혼수의 임상발현이 유의하게 많으며, 이러한

임상증상의 차이로 인해 두 나라 간 치명률에도 차이가 난다고 주장하고 있다. 그러나 이 연구의 한계는 두 나라 간 환자 자료를 직접 비교분석한 것이 아니라, 기존에 발표된 논문 [4,5]에서 추출한 통계수치를 활용하여 간접적으로 비교하였다는 것이다. 따라서 한국 SFTS 환자에서 설사와 정신혼란의 임상적 발현율이 높다는 것을, 사례군 연구(case series study)로 알아볼 필요가 있겠다.

한편, 제주도는 전국의 다른 지역에 비하여 환자 발생이 가장 높은 지역으로 알려져 있다[5]. 따라서 본 연구는 SFTS가 법정감염병으로 신고 대상이 된 이후부터 최근까지 제주도 내에서 발생한 SFTS 발생신고 환자에 대하여 역학적 및 임상적 특성을 알아보고자 한다.

### 대상 및 방법

본 연구의 잠정적 대상은 중증열성혈소판감소증(SFTS) 환자 또는 의심환자로 신고되어, 질병보건통합관리시스템(<https://is.cdc.go.kr>, KCDCIS)에 역학조사서가 등록된 사례들이다. 이들 중 연구 대상자 최종 선정 기준은 (1) 제주도 주소지를 가진 자로, (2) 첫 환자 신고가 있었던 2014년 7월 16일부터 2018년 11월 30일 사이에, (3) SFTS에 부합되는 임상증상을 나타내면서 진단을 위한 검사기준에 따라 감염병 병원체 감염이 확인된 확진 환자이다.

여기서 임상증상은 고열(38°C-40°C)이 3-10일 지속되며, 혈소판감소 및 백혈구 감소와 구역, 구토, 설사 등 소화기 증상이 나타나거나, 증상발생 5일 후 림프절이 종대되어 1-2주 지속되기도 하며, 다발성장기부전이나 신경학적 증상, 혼수 등 중증사례가 발생하는 경우를 말한다. 진단을 위한 검사기준은 혈액검체에서 바이러스가 분리되거나, 검체(혈액)에서 특이 RNA가 검출되거나, 회복기 혈청의 항체가 급성기에 비하여 4배 이상 증가한 경우이다.

등재된 역학조사서에서 추출한 내용은 일반적 특성과 임상 증상, 노출요인 등이었다. 일반적 특성 중 직업은 노출위험이 높은 환경을 기준으로 농업, 축산업, 산림·숲 관련 업무, 건축업, 골프장 관리 업무, 기타로 분류했고 노출위험이 높은 작업을 정기적으로 하는 경우에는 부업이라도 직업으로 포함하였다. 임상증상 중 고열은 질병관리본부 진드기 매개 감염병 관리 지침을 참고하여 38°C 이상으로 정의했고, 역학조사서상에서 기타로 분류된 전신쇠약감, 무기력 등은 피로에 포함했다.

치명률 및 임상증상 발현율의 95% 신뢰구간은 정규분포를 활용하여 산출하였다. 2×2 표의 독립성 검정을 위하여 Fisher's exact test를 적용하였고, 나머지 독립성 검정에는 카이제곱검정을 적용하였다. 이를 위하여 MedCalc version 18.11 (<https://www.medcalc.org>) 통계프로그램을 사용하였고, *p*-value 0.05 이하를 통계적 유의수준으로 삼았다. 본 연구는 개인정보를 모

르는 2차 자료의 활용인 점에서 소속 대학교의 연구윤리심의 위원회 심의 면제를 받았다.

### 결 과

제주도에서 SFTS 신고가 처음으로 접수된 2014년 7월 16일부터 2018년 11월 30일까지 SFTS 확진 환자는 총 55명이었으며, 이 중 6명이 사망하여 치명률은 10.9% (95% CI: 4.1-22.2) 이었다(Table 1). 연령별로는 60세 미만에서 사망환자는 없었으며, 진단 당시 주소지에 있어서 서귀포시에 비해 제주시에서 사망환자가 유의하게 많았다. 그러나 성별, 발생연도, 직업, 기저질환 여부에 있어서는 사망률의 차이는 보이지 않았다.

**Table 1.** Epidemiological characteristics of confirmed cases of severe fever with thrombocytopenia syndrome, Jeju Province, Korea, 2014-2018

| Characteristics                 | Fatal (n=6) | Non-fatal (n=49) | Total (n=55) | <i>p</i> -value <sup>1</sup> |
|---------------------------------|-------------|------------------|--------------|------------------------------|
| Gender                          |             |                  |              | 0.66                         |
| Man                             | 4 (66.7)    | 28 (57.1)        | 32 (58.2)    |                              |
| Women                           | 2 (33.3)    | 21 (42.9)        | 23 (41.8)    |                              |
| Age (y)                         |             |                  |              | 0.34                         |
| <40                             | 0 (0.0)     | 4 (8.2)          | 4 (7.3)      |                              |
| 40-49                           | 0 (0.0)     | 7 (14.3)         | 7 (12.7)     |                              |
| 50-59                           | 0 (0.0)     | 16 (32.7)        | 16 (29.1)    |                              |
| 60-69                           | 4 (66.7)    | 11 (22.4)        | 15 (27.3)    |                              |
| ≥70                             | 2 (33.3)    | 11 (22.4)        | 13 (23.6)    |                              |
| Residence                       |             |                  |              | 0.03                         |
| Jeju-si                         | 5 (83.3)    | 18 (36.7)        | 23 (41.8)    |                              |
| Seogwipo-si                     | 1 (16.7)    | 31 (63.3)        | 32 (58.2)    |                              |
| Diagnosis date                  |             |                  |              | 0.36                         |
| 2014                            | 0 (0.0)     | 4 (8.2)          | 4 (7.3)      |                              |
| 2015                            | 0 (0.0)     | 9 (18.4)         | 9 (16.4)     |                              |
| 2016                            | 0 (0.0)     | 8 (16.3)         | 8 (14.5)     |                              |
| 2017                            | 3 (50.0)    | 16 (32.7)        | 19 (34.5)    |                              |
| 2018                            | 3 (50.0)    | 12 (24.5)        | 15 (27.3)    |                              |
| Underlying disease <sup>2</sup> |             |                  |              | 0.19                         |
| Yes                             | 3 (50)      | 37 (75.5)        | 40 (72.7)    |                              |
| No                              | 3 (50)      | 12 (24.5)        | 15 (27.3)    |                              |
| Occupation                      |             |                  |              | 0.25                         |
| Farm worker                     | 1 (16.7)    | 23 (46.9)        | 24 (43.6)    |                              |
| Stockbreeder                    | 0 (0.0)     | 5 (10.2)         | 5 (9.1)      |                              |
| Forest worker                   | 1 (16.7)    | 2 (4.1)          | 3 (5.5)      |                              |
| Construction worker             | 0 (0.0)     | 3 (6.1)          | 3 (5.5)      |                              |
| Other                           | 4 (66.7)    | 16 (32.7)        | 20 (36.4)    |                              |

Values are presented as number (%).

<sup>1</sup>Fisher exact test for 2×2 tables; otherwise, chi-square test.

<sup>2</sup>Hypertension, diabetes mellitus, hepatitis B virus infection, tuberculosis, etc.

**Table 2.** Clinical manifestations of severe fever with thrombocytopenia syndrome in confirmed cases, Jeju Province, Korea, 2014-2018

| Category                    | Fatal (n=6) | Non-fatal (n=49) | Total (n=55) | 95% CI of proportion | p-value <sup>1</sup> |
|-----------------------------|-------------|------------------|--------------|----------------------|----------------------|
| Fever                       | 5 (83.3)    | 41 (83.7)        | 46 (83.6)    | 71.2, 92.2           | 0.98                 |
| Fatigue                     | 3 (50.0)    | 17 (34.7)        | 20 (36.4)    | 23.8, 50.5           | 0.47                 |
| Anorexia                    | 2 (33.3)    | 15 (30.6)        | 17 (30.9)    | 19.1, 44.8           | 0.89                 |
| Myalgia                     | 0 (0.0)     | 25 (51.0)        | 25 (45.5)    | 32.0, 59.5           | 0.02                 |
| Headache                    | 0 (0.0)     | 16 (32.7)        | 16 (29.1)    | 17.6, 42.9           | 0.10                 |
| Arthralgia                  | 0 (0.0)     | 2 (4.1)          | 2 (3.6)      | 0.4, 12.5            | 0.62                 |
| Gastrointestinal symptoms   |             |                  |              |                      |                      |
| Nausea                      | 1 (16.7)    | 17 (34.7)        | 18 (32.7)    | 20.7, 46.7           | 0.38                 |
| Vomiting                    | 1 (16.7)    | 8 (16.3)         | 9 (16.4)     | 7.8, 28.8            | 0.98                 |
| Diarrhea                    | 2 (33.3)    | 20 (40.8)        | 22 (40.0)    | 27.0, 54.1           | 0.73                 |
| Abdominal pain              | 0 (0.0)     | 6 (12.2)         | 6 (10.9)     | 4.1, 22.2            | 0.37                 |
| Respiratory system symptoms |             |                  |              |                      |                      |
| Cough                       | 1 (16.7)    | 3 (6.1)          | 4 (7.3)      | 2.0, 17.6            | 0.35                 |
| Sputum                      | 1 (16.7)    | 3 (6.1)          | 4 (7.3)      | 2.0, 17.6            | 0.35                 |
| Nervous system symptoms     |             |                  |              |                      |                      |
| Mental deterioration        | 1 (16.7)    | 3 (6.1)          | 4 (7.3)      | 2.0, 17.6            | 0.35                 |
| Bleeding tendency           |             |                  |              |                      |                      |
| Melena                      | 0 (0.0)     | 2 (4.1)          | 2 (3.6)      | 0.4, 12.5            | 0.62                 |
| Hematuria                   | 0 (0.0)     | 1 (2.0)          | 1 (1.8)      | 0.0, 9.69            | 0.73                 |
| Hemorrhagia                 | 0 (0.0)     | 2 (4.1)          | 2 (3.6)      | 0.4, 12.5            | 0.62                 |
| Others                      | 0 (0.0)     | 3 (6.1)          | 3 (5.5)      | 1.2, 15.2            | 0.54                 |
| Enlarged-lymph nodes        | 0 (0.0)     | 3 (6.1)          | 3 (5.5)      | 1.2, 15.2            | 0.54                 |
| Other symptoms              | 1 (16.7)    | 4 (8.2)          | 5 (9.1)      | 3.0, 20.0            | 0.50                 |
| Leukopenia                  | 5 (83.3)    | 44 (89.8)        | 49 (89.1)    | 77.8, 95.9           | 0.63                 |
| Thrombocytopenia            | 6 (100)     | 41 (83.7)        | 47 (85.5)    | 73.7, 93.7           | 0.29                 |

<sup>1</sup>Fisher exact test.

임상적 특성상 고열 83.6% (95% CI: 71.2-92.2), 근육통 45.5% (95% CI: 32.0-59.5), 설사 40.0% (95% CI: 27.0-54.1) 순으로 발현율이 높았다(Table 2). 혼수의 발현율은 7.3% (95% CI: 2.03-17.6)로 상대적으로 낮았다. 실험실 결과상 백혈구감소증 89.1% (95% CI: 77.8-95.9)와 혈소판 감소증 85.5% (95% CI: 73.7-93.7) 양성률을 보였다. 그러나 사망 여부에 있어서 근육통만이 통계적으로 유의한 차이를 보였지만, 사망자에서 근육통을 호소한 경우가 전무하였다.

## 토 론

주요 결과를 요약하자면, 제주도민의 SFTS 환자에 있어 사망은 60세 이상의 노인에서 발생하여 치명률은 10.9% (95%CI: 4.1-22.2)이며, 임상증상은 고열(83.6%), 근육통(45.5%), 설사(40.0%) 순으로 발현율이 높았다.

2014-2018년 제주도 환자의 SFTS 치명률 10.9% 수준은 2013-2015년 한국인 환자 32.6% [5]보다 유의하게 낮은 수준이며

**Table 3.** Case fatality rates in reported references

|                        | China, nationwide | Korea, nationwide | Korea, nationwide                                       | Korea, Jeju Province |
|------------------------|-------------------|-------------------|---------------------------------------------------------|----------------------|
| Incidence year         | 2010-2013         | 2013-2015         | 2014-2017                                               | 2014-2018            |
| Case fatality rate (%) | 12.2              | 32.6              | 19.3                                                    | 10.9                 |
| Source [Ref]           | [4]               | [5]               | <a href="https://is.cdc.go.kr">https://is.cdc.go.kr</a> |                      |

( $p < 0.01$ ), 오히려 2010-2013년 중국인 환자 12.2% [4]와 유사한 수준이었다( $p = 0.77$ ) (Table 3). 그러나 본 연구 결과의 비교성을 높이기 위하여 KCDCIS에서 2014-2017년도 전국 SFTS 확진자와 사망자를 알아본 결과, 571명 발생자 중 사망자 110명으로 치명률은 19.3% (95% CI: 16.1-22.8)이었다. 이처럼 최근으로 올수록 치명률이 낮아지는 것은 다음 두 가지 점을 고려할 수 있다. 첫째, 보건의료종사자뿐만 아니라 일반인에 대한 SFTS 인식이 높아질수록 진단 당시 예후가 좋아질 수 있음을 감안할 때 최근으로 올수록 치명률은 감소할 수 있을 것으로 추론

할 수 있다. 둘째, 연구들 간 인적 특성(성별 및 연령군) 분포가 유사한 점을 감안할 때, 진단 이후 치료과정의 잠재적 예후 요인들의 차이가 있는가를 알아볼 필요가 있다. 그러나 본 연구는 진단 이후 치료과정에 대한 정보를 획득할 수 없다는 점에서, 향후 비교연구가 추가로 필요하겠다.

제주도 환자의 고열 발현율 83.6% 수준은 중국 99.7%뿐만 아니라 한국 93.5% [3]에 비하여 통계적으로 유의하게 낮았다( $p < 0.01$ ). 제주도 환자의 근육통 발현율 45.5%도 중국 84.4%, 한국 63.3%에 비하여 통계적으로 유의하게 낮았다( $p < 0.01$ ). 또한 예후 요인으로 알려진 혼수[5]에 있어서 제주도 환자 발현율 7.3%는 한국 25.6%, 중국 21.1%보다 통계적으로 유의하게 낮은 수준이다( $p = 0.01$ ). 반면, 제주도 환자의 설사 발현율 40.0%는 한국 54.3%에 비하여 유의하게 낮았으며( $p = 0.03$ ), 중국 35.8%와는 통계적 유의성이 없었다( $p = 0.52$ ). 이를 정리하자면 제주도 SFTS 환자의 임상특성상 고열, 근육통, 혼수 발현율은 상대적으로 낮으며, 설사는 중국환자와 유사한 수준이었다. 이처럼 2013-2015년 한국 환자에 비하여 2014-2018년 제주 환자는 덜 심한 임상 증상을 보였다고 해석할 수 있다. 이에 따라 2013-2015 환자에 비하여 치명률이 낮게 나온 것으로 추론할 수 있겠다.

Tables 1, 2에서 사망 여부에 있어 통계적으로 유의한 차이를 보이는 변수들(연령, 주소지, 근육통)을 이용하여 예후요인 분석을 시도해 볼 수 있겠다. 그러나 이에 대한 분석은 하지 않았다. 그 이유는 첫째, 진단 당시의 행정상 등록된 주소지와 진단기에 폭로된 실제 거주지와는 다를 수 있기 때문이다[6]. 둘째, 환자 본인이 호소해야만 알 수 있는 주관적인 임상증상인 근육통에 있어서 사망자 6명 모두 증상호소가 없다는 점이다. 따라서 진료과정에서 만들어진 의무기록 자료가 아니라 신고보고체계를 통해 구축된 자료를 근거로 예후요인으로 평가하기에는 부적절하다고 판단하기 때문이다. 이상의 두 가지 이유들은 곧 본 연구의 주요 한계점이다.

결론적으로 2014-2018년 제주도 SFTS 환자의 치명률은 10.9% (95%CI: 4.1-22.2)로 2013-2015년 전국 SFTS 환자와 비교하여 낮았지만, 같은 관찰기간인 2014-2017년 전국 SFTS 환자의 치명률 19.3% (95%CI: 16.1-22.8)와는 유사한 수준이다(Table 3). 이런 사실에 있어서, 발생한 환자를 조기에 발견하고 진단할 수 있

는 도내 감염병 감시체계 운영이 강화되어 왔기 때문이라고 해석할 수 있겠다. 그렇지만 2018년 11월 제주도 보건당국은 SFTS 2차 감염이 발생하였다는 보고를 감안할 때[7] SFTS 발생을 예방하기 위한 도민 홍보뿐만 아니라, 환자 진료를 담당할 보건의료인에 대한 감시체계 정보 공유를 확대해 나갈 필요가 있겠다.

## 참고문헌

1. Robles NJ, Han HJ, Park SJ, Choi YK. Epidemiology of severe fever and thrombocytopenia syndrome virus infection and the need for therapeutics for the prevention. *Clin Exp Vaccine Res* 2018;7(1):43-50.
2. Yu XJ, Liang MF, Zhang SY, Liu Y, Li JD, Sun YL, et al. Fever with thrombocytopenia associated with a novel bunyavirus in China. *N Engl J Med* 2011;364(16):1523-1532.
3. Bae JM. Differences of clinical manifestation of severe fever with thrombocytopenia syndrome between Korean and Chinese patients. *J Korean Soc Emerg Med* 2019;30(3) (in press).
4. Guo CT, Lu QB, Ding SJ, Hu CY, Hu JG, Wo Y, et al. Epidemiological and clinical characteristics of severe fever with thrombocytopenia syndrome (SFTS) in China: an integrated data analysis. *Epidemiol Infect* 2016;144(6):1345-1354.
5. Choi SJ, Park SW, Bae IG, Kim SH, Ryu SY, Kim HA, et al. Severe fever with thrombocytopenia syndrome in South Korea, 2013-2015. *PLoS Negl Trop Dis* 2016;10(12):e0005264.
6. Bae JM. Epidemiological characteristics of scrub typhus on the Jeju Island. *Epidemiol Health* 2017;39:e2017060.
7. Jeju Special Self-Governing Province. Report of second infection on severe fever and thrombocytopenia syndrome [cited 2018 Dec 13]. Available from: [https://www.jeju.go.kr/news/bodo/list.htm;jsessionid=GJkn12worQo605EqLshkscdkgCO570pLYkeOpjw3K9YiqI80kfrH8yT2dBCCDaz.was2\\_servlet\\_engine6?category=84&\\_layout=playout&\\_view=print&page=3&act=view&seq=1120332](https://www.jeju.go.kr/news/bodo/list.htm;jsessionid=GJkn12worQo605EqLshkscdkgCO570pLYkeOpjw3K9YiqI80kfrH8yT2dBCCDaz.was2_servlet_engine6?category=84&_layout=playout&_view=print&page=3&act=view&seq=1120332) (Korean).
